# Supplementary material for: Dkk1 as a Prognostic Marker for Neoadjuvant Chemotherapy Response in Breast Cancer Patients
Source: MDPI journal article supplement (doi:10.3390/cancers16020419), 2024-01-18
Supplement: s1 [file s1]

**Supplementary Table S2.** The clinicopathological findings of women cases with increased Dkk1-IRSs

| Case | Age<br>(Years) | BMI | TNM staging at<br>time of diagnosis |   |   | G<br>status | Ki-67<br>Index<br>(%) | Histological<br>subtype | TNM staging at time<br>of operation |   |   | *Therapy<br>completed | R | OS   | Dkk1-IRS<br>Core-needle<br>Biopsy<br>tissue | Dkk1-IRS<br>Mammary<br>carcinoma<br>tissue | Increasment<br>percentage<br>(%) |
|------|----------------|-----|-------------------------------------|---|---|-------------|-----------------------|-------------------------|-------------------------------------|---|---|-----------------------|---|------|---------------------------------------------|--------------------------------------------|----------------------------------|
|      |                |     | T                                   | N | M |             |                       |                         | T                                   | N | M |                       |   |      |                                             |                                            |                                  |
| 1    | 45             | 37  | 3                                   | 1 | 0 | 2           | 10                    | Luminal A               | 4                                   | 0 | 1 | Yes                   | 1 | Died | 3                                           | 8                                          | 167                              |
| 2    | 65             | 24  | 2                                   | 3 | 0 | 3           | 80                    | TNBC                    | 4                                   | 2 | 1 | No                    | 1 | Died | 4                                           | 8                                          | 100                              |
| 3    | 42             | 32  | 2                                   | 0 | 0 | 3           | 30                    | TNBC                    | 1                                   | 3 | 1 | Yes                   | 2 | Died | 2                                           | 4                                          | 100                              |

\*All three patients recieved NACH including Taxanes (Paclitaxel or Docetaxel), Epirubicin, and Cyclophosphamide. BMI: Body mass index. R: Regression grade according to Sinn. OS: Overall survival status.
