# Supplementary material for: Dkk1 as a Prognostic Marker for Neoadjuvant Chemotherapy Response in Breast Cancer Patients
Source: MDPI journal article supplement (doi:10.3390/cancers16020419), 2024-01-18
Supplement: s1 [file s1]

**Supplementary Table S4.** The correlation between percentage of Dkk1-IRS reduction and NACT characteristics

|                                  | Group 1                         | Group 2                           | Group 3                         | <i>p</i> value |
|----------------------------------|---------------------------------|-----------------------------------|---------------------------------|----------------|
|                                  | Reduction<br>percentage<br><50% | Reduction<br>percentage<br>50–75% | Reduction<br>percentage<br>>75% |                |
| <b>Completed therapy</b>         |                                 |                                   |                                 |                |
| Yes                              | 20 (40%)                        | 20 (40%)                          | 10 (20%)                        | 0.410          |
| No                               | 3 (20%)                         | 8 (53%)                           | 4 (27%)                         |                |
| <b>*Therapy protocol</b>         |                                 |                                   |                                 |                |
| All therapy included Paclitaxel  | 11 (42%)                        | 9 (35%)                           | 6 (23%)                         | 0.652          |
| All therapies included Docetaxel | 13 (57%)                        | 6 (26%)                           | 4 (17%)                         |                |

\* Depending on whether Paclitaxel or Docetaxel was used as a taxane agent, two groups of therapy protocols were created. Data are presented as number (N) and percentage (%). *p* value is calculated using the chi-square test.
