# Supplementary material for: Dkk1 as a Prognostic Marker for Neoadjuvant Chemotherapy Response in Breast Cancer Patients
Source: MDPI journal article supplement (doi:10.3390/cancers16020419), 2024-01-18
Supplement: s1 [file s1]

**Supplementary Table S1.** Dkk1-IRS reduction scores in 68 matched cases

|      | Core needle biopsy tissues          |                     |                                | Mammary carcinoma tissues           |                     |                                | Differences in Dkk1 expression |                           |
|------|-------------------------------------|---------------------|--------------------------------|-------------------------------------|---------------------|--------------------------------|--------------------------------|---------------------------|
| Case | *Percentage of stained tumour cells | °Staining intensity | ^Immuno-reactive score (IRS 1) | *Percentage of stained tumour cells | °Staining intensity | ^Immuno-reactive score (IRS 2) | IRS 1-IRS 2                    | †Reduction percentage (%) |
| 1    | 4                                   | 2                   | 8                              | 4                                   | 0                   | 0                              | 8                              | 100                       |
| 2    | 4                                   | 2                   | 8                              | 4                                   | 0                   | 0                              | 8                              | 100                       |
| 3    | 4                                   | 2                   | 8                              | 0                                   | 0                   | 0                              | 8                              | 100                       |
| 4    | 4                                   | 1                   | 4                              | 0                                   | 0                   | 0                              | 4                              | 100                       |
| 5    | 4                                   | 1                   | 4                              | 4                                   | 0                   | 0                              | 4                              | 100                       |
| 6    | 4                                   | 1                   | 4                              | 0                                   | 0                   | 0                              | 4                              | 100                       |
| 7    | 4                                   | 2                   | 8                              | 4                                   | 0                   | 0                              | 8                              | 100                       |
| 8    | 3                                   | 1                   | 3                              | 4                                   | 0                   | 0                              | 3                              | 100                       |
| 9    | 4                                   | 2                   | 8                              | 4                                   | 0                   | 0                              | 8                              | 100                       |
| 10   | 4                                   | 1                   | 4                              | 4                                   | 0                   | 0                              | 4                              | 100                       |
| 11   | 4                                   | 3                   | 12                             | 2                                   | 1                   | 2                              | 10                             | 83                        |
| 12   | 4                                   | 3                   | 12                             | 2                                   | 1                   | 2                              | 10                             | 83                        |
| 13   | 4                                   | 3                   | 12                             | 2                                   | 1                   | 2                              | 10                             | 83                        |
| 14   | 3                                   | 3                   | 9                              | 2                                   | 1                   | 2                              | 7                              | 78                        |
| 15   | 4                                   | 2                   | 8                              | 2                                   | 1                   | 2                              | 6                              | 75                        |
| 16   | 4                                   | 2                   | 8                              | 2                                   | 1                   | 2                              | 6                              | 75                        |
| 17   | 4                                   | 2                   | 8                              | 2                                   | 1                   | 2                              | 6                              | 75                        |
| 18   | 4                                   | 2                   | 8                              | 2                                   | 1                   | 2                              | 6                              | 75                        |
| 19   | 4                                   | 2                   | 8                              | 2                                   | 1                   | 2                              | 6                              | 75                        |
| 20   | 4                                   | 3                   | 12                             | 3                                   | 1                   | 3                              | 9                              | 75                        |
| 21   | 4                                   | 3                   | 12                             | 3                                   | 1                   | 3                              | 9                              | 75                        |
| 22   | 4                                   | 3                   | 12                             | 4                                   | 1                   | 4                              | 8                              | 67                        |
| 23   | 3                                   | 2                   | 6                              | 2                                   | 1                   | 2                              | 4                              | 67                        |
| 24   | 4                                   | 3                   | 12                             | 4                                   | 1                   | 4                              | 8                              | 67                        |
| 25   | 4                                   | 3                   | 12                             | 4                                   | 1                   | 4                              | 8                              | 67                        |
| 26   | 4                                   | 2                   | 8                              | 3                                   | 1                   | 3                              | 5                              | 63                        |
| 27   | 4                                   | 2                   | 8                              | 4                                   | 3                   | 3                              | 5                              | 63                        |
| 28   | 4                                   | 2                   | 8                              | 3                                   | 1                   | 3                              | 5                              | 63                        |
| 29   | 4                                   | 2                   | 8                              | 3                                   | 1                   | 3                              | 5                              | 63                        |
| 30   | 4                                   | 2                   | 8                              | 3                                   | 1                   | 3                              | 5                              | 63                        |
| 31   | 4                                   | 2                   | 8                              | 3                                   | 1                   | 3                              | 5                              | 63                        |
| 32   | 3                                   | 3                   | 9                              | 4                                   | 1                   | 4                              | 5                              | 56                        |
| 33   | 3                                   | 3                   | 9                              | 2                                   | 2                   | 4                              | 5                              | 56                        |
| 34   | 3                                   | 3                   | 9                              | 4                                   | 1                   | 4                              | 5                              | 56                        |
| 35   | 4                                   | 2                   | 8                              | 4                                   | 1                   | 4                              | 4                              | 50                        |
| 36   | 4                                   | 3                   | 12                             | 3                                   | 2                   | 6                              | 6                              | 50                        |
| 37   | 4                                   | 2                   | 8                              | 4                                   | 1                   | 4                              | 4                              | 50                        |
| 38   | 4                                   | 2                   | 8                              | 4                                   | 1                   | 4                              | 4                              | 50                        |
| 39   | 3                                   | 2                   | 6                              | 3                                   | 1                   | 3                              | 3                              | 50                        |
| 40   | 4                                   | 3                   | 12                             | 3                                   | 2                   | 6                              | 6                              | 50                        |

| Case | Core needle biopsy tissues          |                     |                                | Mammary carcinoma tissues           |                     |                                | Differences in Dkk1 expression |                           |
|------|-------------------------------------|---------------------|--------------------------------|-------------------------------------|---------------------|--------------------------------|--------------------------------|---------------------------|
|      | *Percentage of stained tumour cells | °Staining intensity | ΔImmuno-reactive score (IRS 1) | *Percentage of stained tumour cells | °Staining intensity | ΔImmuno-reactive score (IRS 2) | IRS 1-IRS 2                    | ‡Reduction percentage (%) |
| 41   | 4                                   | 2                   | 8                              | 4                                   | 1                   | 4                              | 4                              | 50                        |
| 42   | 4                                   | 2                   | 8                              | 4                                   | 1                   | 4                              | 4                              | 50                        |
| 43   | 3                                   | 3                   | 9                              | 3                                   | 2                   | 6                              | 3                              | 33                        |
| 44   | 4                                   | 3                   | 12                             | 4                                   | 2                   | 8                              | 4                              | 33                        |
| 45   | 4                                   | 3                   | 12                             | 4                                   | 2                   | 8                              | 4                              | 33                        |
| 46   | 3                                   | 2                   | 6                              | 4                                   | 1                   | 4                              | 2                              | 33                        |
| 47   | 4                                   | 3                   | 12                             | 4                                   | 2                   | 8                              | 4                              | 33                        |
| 48   | 4                                   | 3                   | 12                             | 4                                   | 2                   | 8                              | 4                              | 33                        |
| 49   | 4                                   | 3                   | 12                             | 4                                   | 2                   | 8                              | 4                              | 33                        |
| 50   | 4                                   | 3                   | 12                             | 4                                   | 2                   | 8                              | 4                              | 33                        |
| 51   | 4                                   | 3                   | 12                             | 4                                   | 2                   | 8                              | 4                              | 33                        |
| 52   | 4                                   | 3                   | 12                             | 4                                   | 2                   | 8                              | 4                              | 33                        |
| 53   | 4                                   | 3                   | 12                             | 4                                   | 2                   | 8                              | 4                              | 33                        |
| 54   | 4                                   | 1                   | 4                              | 3                                   | 1                   | 3                              | 1                              | 25                        |
| 55   | 4                                   | 2                   | 8                              | 2                                   | 3                   | 6                              | 2                              | 25                        |
| 56   | 3                                   | 3                   | 9                              | 4                                   | 2                   | 8                              | 1                              | 11                        |
| 57   | 4                                   | 2                   | 8                              | 4                                   | 2                   | 8                              | 0                              | 0                         |
| 58   | 4                                   | 2                   | 8                              | 4                                   | 2                   | 8                              | 0                              | 0                         |
| 59   | 4                                   | 2                   | 8                              | 4                                   | 2                   | 8                              | 0                              | 0                         |
| 60   | 4                                   | 1                   | 4                              | 4                                   | 1                   | 4                              | 0                              | 0                         |
| 61   | 3                                   | 1                   | 3                              | 3                                   | 1                   | 3                              | 0                              | 0                         |
| 62   | 4                                   | 3                   | 12                             | 4                                   | 3                   | 12                             | 0                              | 0                         |
| 63   | 4                                   | 2                   | 8                              | 4                                   | 2                   | 8                              | 0                              | 0                         |
| 64   | 4                                   | 3                   | 12                             | 4                                   | 3                   | 12                             | 0                              | 0                         |
| 65   | 4                                   | 2                   | 8                              | 4                                   | 2                   | 8                              | 0                              | 0                         |
| 66   | 4                                   | 1                   | 4                              | 4                                   | 2                   | 8                              | -4                             | -100                      |
| 67   | 2                                   | 1                   | 2                              | 4                                   | 1                   | 4                              | -2                             | -100                      |
| 68   | 3                                   | 1                   | 3                              | 4                                   | 2                   | 8                              | -5                             | -167                      |

\*The percentage of stained tumour cells was divided into four categories: <10% of cells (Score 1), 10–50% of cells (Score 2), 51–80% of cells (Score 3), and >80% of cells (Score 4). °The intensity of staining was classified as negative (Score 0), weakly positive (Score 1), moderately positive (Score 2), or strongly positive (Score 3). ΔIRS was calculated by multiplying the percentage of stained tumour cells by the intensity of the staining. IRS values ranged from 0 to 12. Dkk1 expression was graded as either negative (IRS=0–2), weak (IRS=3–4), moderate (IRS=6–8), or strong (IRS=9–12). ‡Dkk1 reduction percentage was calculated using the following formula: Dkk1 reduction percentage = [(Dkk1-IRS in core needle biopsy tissue-Dkk1-IRS in mammary carcinoma tissue)×100] / Dkk1-IRS in core needle biopsy tissue.
