# Supplementary material for: Dkk1 as a Prognostic Marker for Neoadjuvant Chemotherapy Response in Breast Cancer Patients
Source: MDPI journal article supplement (doi:10.3390/cancers16020419), 2024-01-18
Supplement: s1 [file s1]

**Supplementary Table S3.** NACT protocols of 50 patients with completed treatment courses

| Nr. | Therapy                                                                                                                                                                                                        | Dkk1-IRS reduction (%) |
|-----|----------------------------------------------------------------------------------------------------------------------------------------------------------------------------------------------------------------|------------------------|
| 1   | 4xEC (Epirubicin 90 mg/m <sup>2</sup> +Cyclophosphamide 600 mg/m <sup>2</sup> i.v./3 weeks), followed with 12xPaclitaxel (80 mg/m <sup>2</sup> i.v./week)                                                      | 33                     |
| 2   | 4xEC (Epirubicin 90 mg/m <sup>2</sup> +Cyclophosphamide 600 mg/m <sup>2</sup> i.v./3 weeks), followed with 12xPaclitaxel (80 mg/m <sup>2</sup> i.v./week)                                                      | 33                     |
| 3   | 4xEC (Epirubicin 90 mg/m <sup>2</sup> +Cyclophosphamide 600 mg/m <sup>2</sup> i.v./3 weeks), followed with 12xPaclitaxel (80 mg/m <sup>2</sup> i.v./week)                                                      | 83                     |
| 4   | 4xEC (Epirubicin 90 mg/m <sup>2</sup> +Cyclophosphamide 600 mg/m <sup>2</sup> i.v./3 weeks), followed with 12xPaclitaxel (80 mg/m <sup>2</sup> i.v./week)                                                      | 100                    |
| 5   | 4xEC (Epirubicin 90 mg/m <sup>2</sup> +Cyclophosphamide 600 mg/m <sup>2</sup> i.v./3 weeks), followed with 12xPaclitaxel (80 mg/m <sup>2</sup> i.v./week)                                                      | 33                     |
| 6   | 4xEC (Epirubicin 90 mg/m <sup>2</sup> +Cyclophosphamide 600 mg/m <sup>2</sup> i.v./3 weeks), followed with 12xPaclitaxel (80 mg/m <sup>2</sup> i.v./week)                                                      | 0                      |
| 7   | 4xEC (Epirubicin 90 mg/m <sup>2</sup> +Cyclophosphamide 600 mg/m <sup>2</sup> i.v./3 weeks), followed with 12xPaclitaxel (80 mg/m <sup>2</sup> i.v./week)                                                      | 0                      |
| 8   | 4xEC (Epirubicin 90 mg/m <sup>2</sup> +Cyclophosphamide 600 mg/m <sup>2</sup> i.v./3 weeks), followed with 12xPaclitaxel (80 mg/m <sup>2</sup> i.v./week)                                                      | 67                     |
| 9   | 4xEC (Epirubicin 90 mg/m <sup>2</sup> +Cyclophosphamide 600 mg/m <sup>2</sup> i.v./3 weeks), followed with 12xPaclitaxel (80 mg/m <sup>2</sup> i.v./week)                                                      | 50                     |
| 10  | 4xEC (Epirubicin 90 mg/m <sup>2</sup> +Cyclophosphamide 600 mg/m <sup>2</sup> i.v./3 weeks), followed with 12xPaclitaxel (80 mg/m <sup>2</sup> i.v./week)                                                      | 63                     |
| 11  | 4xEC (Epirubicin 90 mg/m <sup>2</sup> +Cyclophosphamide 600 mg/m <sup>2</sup> i.v./3 weeks), followed with 12xPaclitaxel (80 mg/m <sup>2</sup> i.v./week)                                                      | 56                     |
| 12  | 3xEC (Epirubicin 90 mg/m <sup>2</sup> +Cyclophosphamide 600 mg/m <sup>2</sup> i.v./3 weeks), followed with 9xPaclitaxel (80 mg/m <sup>2</sup> i.v./week)                                                       | 63                     |
| 13  | 4xEC (Epirubicin 90 mg/m <sup>2</sup> +Cyclophosphamide 600 mg/m <sup>2</sup> i.v./3 weeks), followed with 12xPaclitaxel (80 mg/m <sup>2</sup> i.v./week) +Carboplatin (AUC 1,5-2 i.v./week)                   | 100                    |
| 14  | 4xEC (Epirubicin 90 mg/m <sup>2</sup> +Cyclophosphamide 600 mg/m <sup>2</sup> i.v./3 weeks), followed with 12xPaclitaxel (80 mg/m <sup>2</sup> i.v./week) +Carboplatin (AUC 1,5-2 i.v./week)                   | 63                     |
| 15  | 4xEC (Epirubicin 90 mg/m <sup>2</sup> +Cyclophosphamide 600 mg/m <sup>2</sup> i.v./3 weeks), followed with 12xPaclitaxel (80 mg/m <sup>2</sup> i.v./week) +Carboplatin (AUC 1,5-2 i.v./week)                   | 100                    |
| 16  | 4xEC (Epirubicin 90 mg/m <sup>2</sup> +Cyclophosphamide 600 mg/m <sup>2</sup> i.v./3 weeks), followed with 12xPaclitaxel (80 mg/m <sup>2</sup> i.v./week)+(Trastusumab 6mg/kg+420 mg Pertuzumab i.v./3 weeks)  | 0                      |
| 17  | 4xEC (Epirubicin 90 mg/m <sup>2</sup> +Cyclophosphamide 600 mg/m <sup>2</sup> i.v./3 weeks), followed with 12xPaclitaxel (80 mg/m <sup>2</sup> i.v./week)+ (Trastusumab 6mg/kg+420 mg Pertuzumab i.v./3 weeks) | 33                     |
| 18  | 7xPaclitaxel (80 mg/m <sup>2</sup> i.v./week)                                                                                                                                                                  | 67                     |
| 19  | 18x nab-paclitaxel (80 mg/m <sup>2</sup> i.v./week)                                                                                                                                                            | 50                     |
| 20  | 18x nab-paclitaxel (80 mg/m <sup>2</sup> i.v./week)+Bevacizumab (15 mg/kg i.v./3 weeks)                                                                                                                        | 100                    |
| 21  | 6xPaclitaxel (80 mg/m <sup>2</sup> i.v./week)+Bevacizumab (15 mg/kg i.v./3 weeks)                                                                                                                              | 33                     |
| 22  | 2xPaclitaxel (80 mg/m <sup>2</sup> i.v./week)+Bevacizumab (15 mg/kg i.v./3 weeks)                                                                                                                              | 33                     |
| 23  | 3xETC (Epirubicin 150 mg/m <sup>2</sup> +Paclitaxel 225 mg/m <sup>2</sup> +Cyclophosphamide 2000mg/μ2) i.v./2 weeks                                                                                            | 100                    |
| 24  | 3xETC (Epirubicin 150 mg/m <sup>2</sup> +Paclitaxel 225 mg/m <sup>2</sup> +Cyclophosphamide 2000mg/μ2) i.v./2 weeks                                                                                            | 75                     |
| 25  | 3xETC (Epirubicin 150 mg/m <sup>2</sup> +Paclitaxel 225 mg/m <sup>2</sup> +Cyclophosphamide 2000mg/μ2) i.v./2 weeks                                                                                            | 63                     |
| 26  | 3xETC (Epirubicin 150 mg/m <sup>2</sup> +Paclitaxel 225 mg/m <sup>2</sup> +Cyclophosphamide 2000mg/μ2) i.v./2 weeks                                                                                            | 63                     |
| 27  | 4x EC (Epirubicin 90 mg/m <sup>2</sup> +Cyclophosphamide 600 mg/m <sup>2</sup> ) i.v./3 weeks, followed with 4x Docetaxel (75 mg/m <sup>2</sup> i.v./3 weeks)                                                  | 63                     |
| 28  | 4x EC (Epirubicin 90 mg/m <sup>2</sup> +Cyclophosphamide 600 mg/m <sup>2</sup> ) i.v./3 weeks, followed with 4x Docetaxel (75 mg/m <sup>2</sup> i.v./3 weeks)                                                  | 75                     |
| 29  | 4x EC (Epirubicin 90 mg/m <sup>2</sup> +Cyclophosphamide 600 mg/m <sup>2</sup> ) i.v./3 weeks, followed with 4x Docetaxel (75 mg/m <sup>2</sup> i.v./3 weeks)                                                  | 0                      |
| 30  | 4x EC (Epirubicin 90 mg/m <sup>2</sup> +Cyclophosphamide 600 mg/m <sup>2</sup> ) i.v./3 weeks, followed with 4x Docetaxel (75 mg/m <sup>2</sup> i.v./3 weeks)                                                  | 25                     |

| Nr. | Therapy                                                                                                                                                                  | Dkk1-IRS reduction (%) |
|-----|--------------------------------------------------------------------------------------------------------------------------------------------------------------------------|------------------------|
| 31  | 4x EC (Epirubicin 90 mg/m <sup>2</sup> +Cyclophosphamide 600 mg/m <sup>2</sup> ) i.v./3 weeks, followed with 4x Docetaxel (75 mg/m <sup>2</sup> i.v./3 weeks)            | 100                    |
| 32  | 4x EC (Epirubicin 90 mg/m <sup>2</sup> +Cyclophosphamide 600 mg/m <sup>2</sup> ) i.v./3 weeks, followed with 4x Docetaxel (75 mg/m <sup>2</sup> i.v./3 weeks)            | 75                     |
| 33  | 4x EC (Epirubicin 90 mg/m <sup>2</sup> +Cyclophosphamide 600 mg/m <sup>2</sup> ) i.v./3 weeks, followed with 4x Docetaxel (75 mg/m <sup>2</sup> i.v./3 weeks)            | 33                     |
| 34  | 4x EC (Epirubicin 90 mg/m <sup>2</sup> +Cyclophosphamide 600 mg/m <sup>2</sup> ) i.v./3 weeks, followed with 4x Docetaxel (75 mg/m <sup>2</sup> i.v./3 weeks)            | 0                      |
| 35  | 4x EC (Epirubicin 90 mg/m <sup>2</sup> +Cyclophosphamide 600 mg/m <sup>2</sup> ) i.v./3 weeks, followed with 4x Docetaxel (75 mg/m <sup>2</sup> i.v./3 weeks)            | 78                     |
| 36  | 4x EC (Epirubicin 90 mg/m <sup>2</sup> +Cyclophosphamide 600 mg/m <sup>2</sup> ) i.v./3 weeks, followed with 4x Docetaxel (75 mg/m <sup>2</sup> i.v./3 weeks)            | 0                      |
| 37  | 4x EC (Epirubicin 90 mg/m <sup>2</sup> +Cyclophosphamide 600 mg/m <sup>2</sup> ) i.v./3 weeks, followed with 4x Docetaxel (75 mg/m <sup>2</sup> i.v./3 weeks)            | 25                     |
| 38  | 4x EC (Epirubicin 90 mg/m <sup>2</sup> +Cyclophosphamide 600 mg/m <sup>2</sup> ) i.v./3 weeks, followed with 4x Docetaxel (75 mg/m <sup>2</sup> i.v./3 weeks)            | 75                     |
| 39  | 4x EC (Epirubicin 90 mg/m <sup>2</sup> +Cyclophosphamide 600 mg/m <sup>2</sup> ) i.v./3 weeks, followed with 2x Docetaxel (75 mg/m <sup>2</sup> i.v./3 weeks)            | 0                      |
| 40  | 4x EC (Epirubicin 90 mg/m <sup>2</sup> +Cyclophosphamide 600 mg/m <sup>2</sup> i.v./3 weeks), followed with 4x Docetaxel (75 mg/m <sup>2</sup> i.v./3 weeks)+Trastusumab | 0                      |
| 41  | 4x EC (Epirubicin 90 mg/m <sup>2</sup> +Cyclophosphamide 600 mg/m <sup>2</sup> i.v./3 weeks), followed with 4x Docetaxel (75 mg/m <sup>2</sup> i.v./3 weeks)+Trastusumab | 67                     |
| 42  | 9xDocetaxel (75 mg/m <sup>2</sup> i.v./3 weeks)+(Trastusumab 6mg/kg+Pertuzumab 420 mg i.v./3 weeks)                                                                      | 50                     |
| 43  | 6xTCH (Docetaxel 75mg/m <sup>2</sup> +Carboplatin AUC 6+Trastuzumab 6 mg/kg+Pertuzumab 420 mg) i.v./3 weeks                                                              | 50                     |
| 44  | 6xTCH (Docetaxel 75mg/m <sup>2</sup> +Carboplatin AUC 6+Trastuzumab 6 mg/kg+Pertuzumab 420 mg) i.v./3 weeks                                                              | 83                     |
| 45  | 6xTAC (Taxotere 75 mg/m <sup>2</sup> +Adriamycin 50 mg/m <sup>2</sup> +Cyclophosphamide 500 mg/m <sup>2</sup> ) i.v./3 weeks                                             | 50                     |
| 46  | 6xTAC (Taxotere 75 mg/m <sup>2</sup> +Adriamycin 50 mg/m <sup>2</sup> +Cyclophosphamide 500 mg/m <sup>2</sup> ) i.v./3 weeks                                             | 100                    |
| 47  | 6xTAC (Taxotere 75 mg/m <sup>2</sup> +Adriamycin 50 mg/m <sup>2</sup> +Cyclophosphamide 500 mg/m <sup>2</sup> ) i.v./3 weeks                                             | 0                      |
| 48  | 6xTAC (Taxotere 75 mg/m <sup>2</sup> +Adriamycin 50 mg/m <sup>2</sup> +Cyclophosphamide 500 mg/m <sup>2</sup> ) i.v./3 weeks                                             | 33                     |
| 49  | 2xTAC (Taxotere 75 mg/m <sup>2</sup> +Adriamycin 50 mg/m <sup>2</sup> +Cyclophosphamide 500 mg/m <sup>2</sup> ) i.v./3 weeks                                             | 56                     |
| 50  | 4xEC (Epirubicin 90 mg/m <sup>2</sup> +Cyclophosphamide 600 mg/m <sup>2</sup> i.v./3 weeks)                                                                              | 33                     |

All protocols were applied according to the German guideline on early detection, diagnosis, treatment of breast cancer [4]. i.v.: Intravenous. AUC: Area under the free carboplatin plasma concentration versus time curve.
